# Supplementary material for: Alkali metal doped ruthenium dioxide nanosheets with lattice distortion as highly active oxygen evolution electrocatalysts in acidic media
Source: Royal Society of Chemistry journal article supplement (doi:10.1039/d3ce00168g), 2023-01-01
Supplement: d3ce00168g1.pdf [file d3ce00168g1.pdf]

## Supporting Information

Alkali Metal Doped Ruthenium Dioxide Nanosheets with  
Lattice Distortion as High Active Oxygen Evolution  
Electrocatalysts in Acidic Media

Hai Tang<sup>a,#</sup>, Ming Kong,<sup>a,#</sup> Wenwen Cao,<sup>b,#</sup> Wenguang Ma<sup>b</sup>, Jianjun Ding<sup>b</sup>, Chuanxin  
Shi,<sup>b,\*</sup> Xiaodong Yang,<sup>b,\*</sup> Qi Shen,<sup>b,\*</sup> Yiqiang Sun<sup>b,c</sup>

-----  
Dr. H. Tang, M. Kong

Suzhou Vocational Institute of Industrial Technology, Suzhou, Jiangsu, 215104, China

Dr. W. W. Cao, M. G. Ma, J. J. Ding, C. X. Shi, X. D. Yang, Q. Shen, Prof. Y. Q. Sun  
School of Chemistry and Chemical Engineering, University of Jinan, Jinan 250022, P.  
R. China

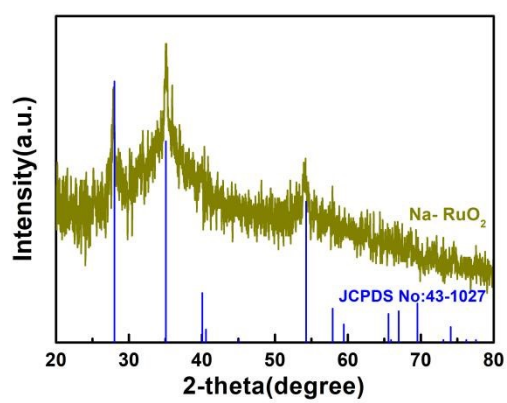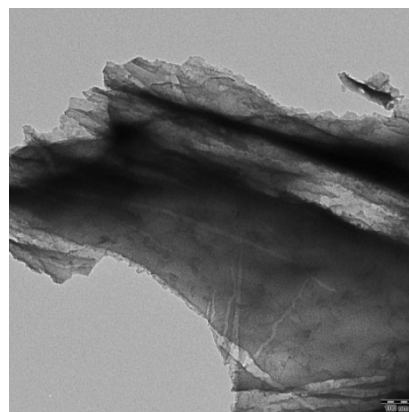

**Figure S1:** (a) XRD pattern and (b) TEM image of Na-RuO<sub>2</sub> nanosheets.

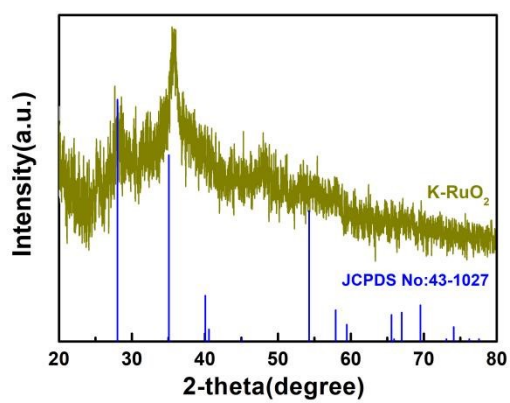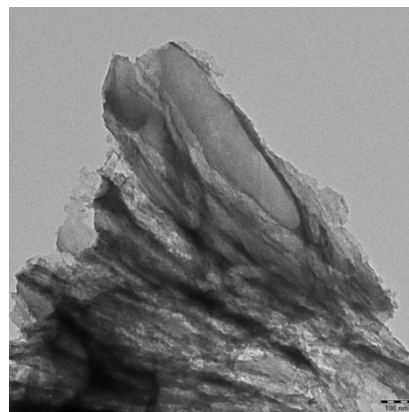

**Figure S2:** (a) XRD pattern and (b) TEM image of K-RuO<sub>2</sub> nanosheets.

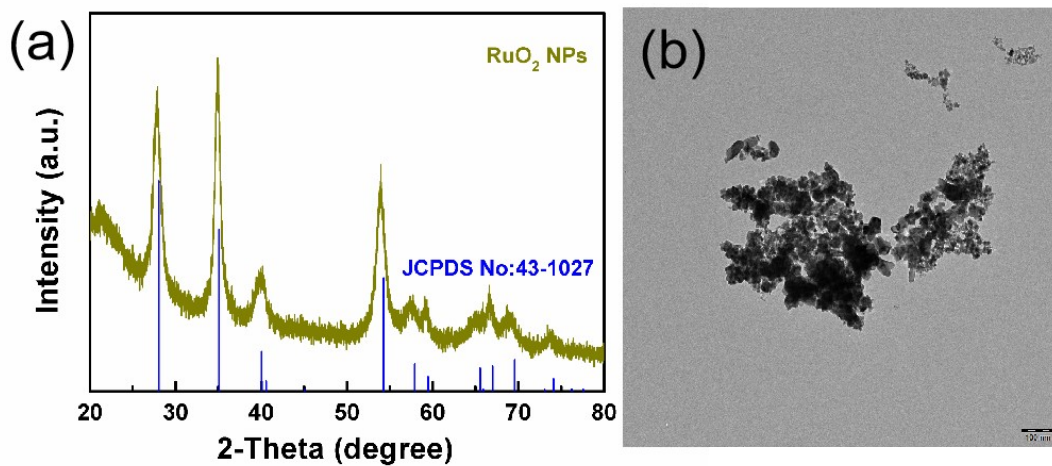

**Figure S3:** (a) XRD pattern and (b) TEM image of RuO<sub>2</sub> NPs.

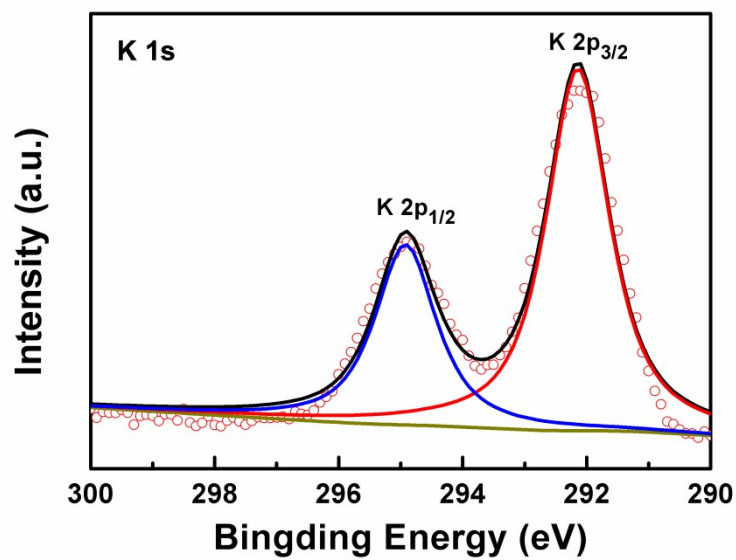

**Figure S4:** The high-resolution XPS spectra of K 2p of K doped RuO<sub>2</sub> NSs.

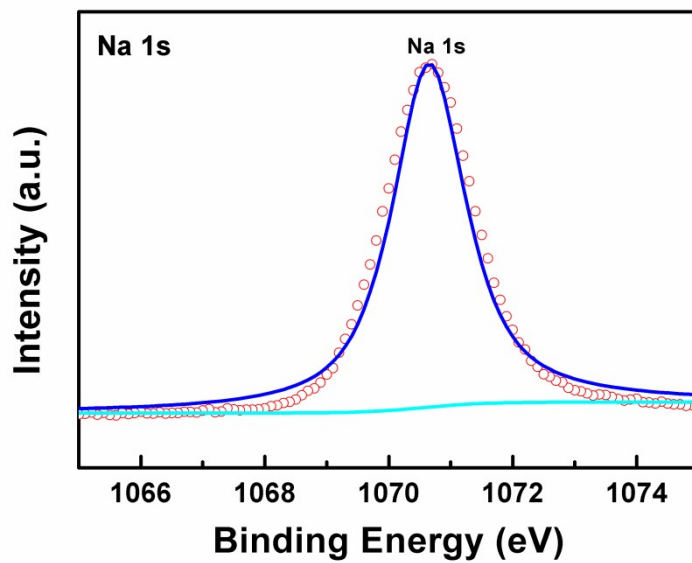

**Figure S5:** The high-resolution XPS spectra of Na 1s of Na doped RuO<sub>2</sub> NSs.

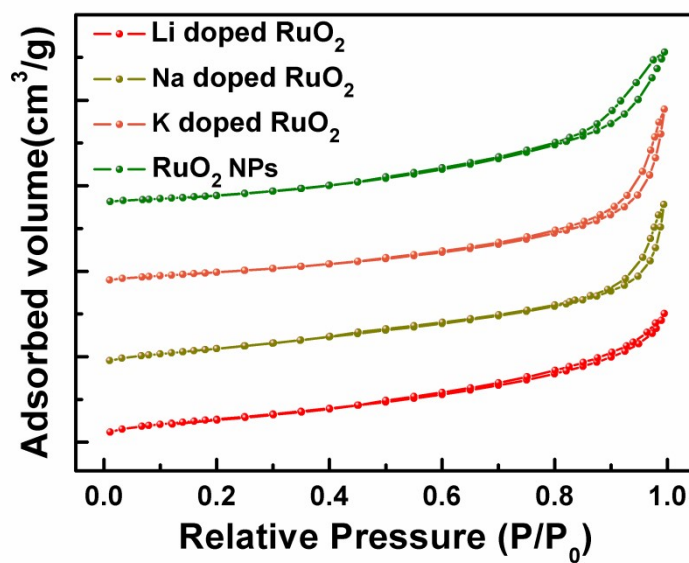

**Figure S6:** N<sub>2</sub> adsorption-desorption isotherms of Li doped RuO<sub>2</sub> NSs, K doped RuO<sub>2</sub> NSs, Na doped RuO<sub>2</sub> NSs and pristine RuO<sub>2</sub> NPs.

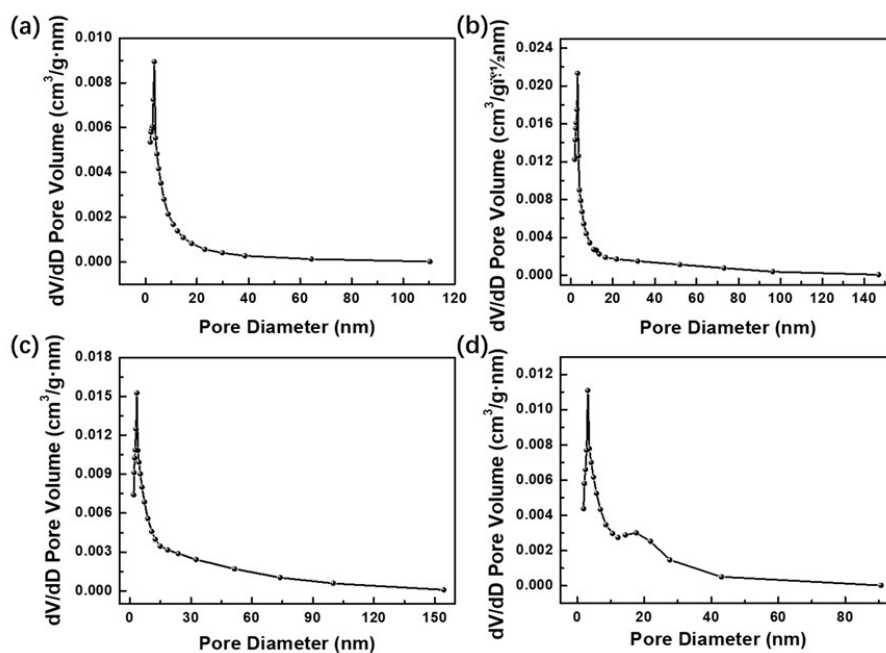

**Figure S7:** Pore size distribution curves of (a) Li doped RuO<sub>2</sub> NSs, (b) K doped RuO<sub>2</sub> NSs, (c) Na doped RuO<sub>2</sub> NSs, (d) pristine RuO<sub>2</sub> NPs.

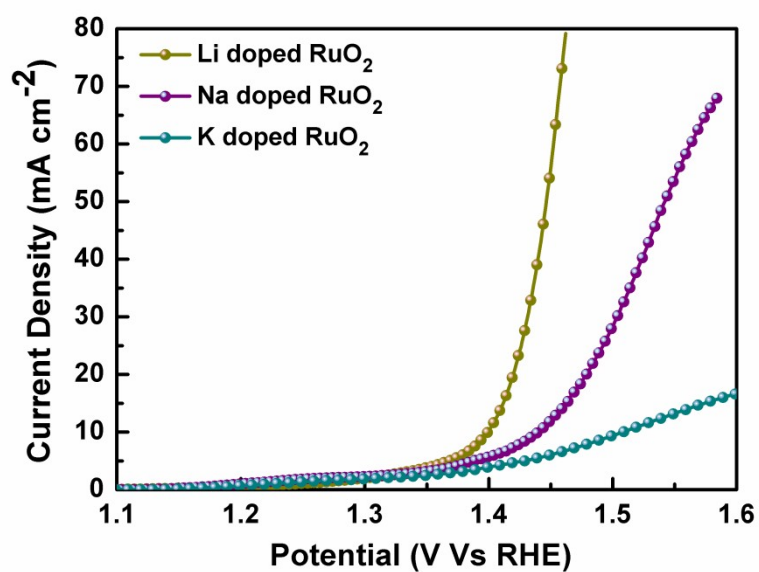

**Figure S8.** LSV curve of Li doped RuO<sub>2</sub> NSs, K doped RuO<sub>2</sub> NSs, Na doped RuO<sub>2</sub> NSs.

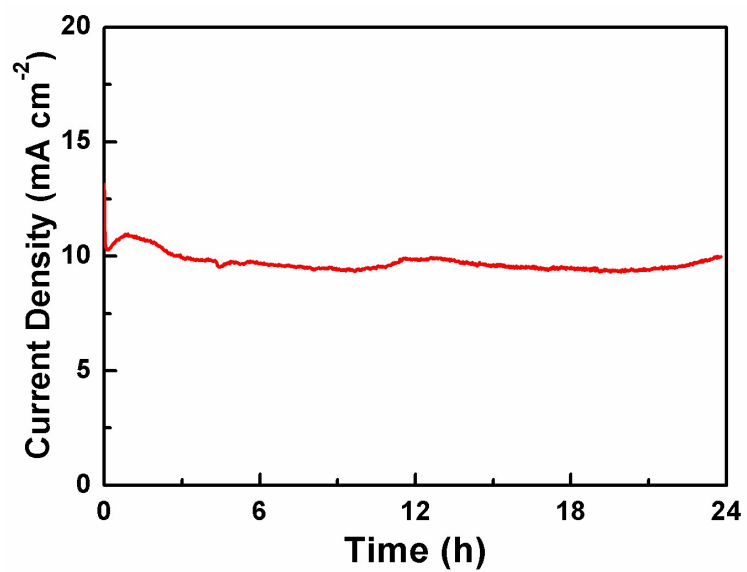

**Figure S9.** The chronoamperometry curves of the Li-doped RuO<sub>2</sub> nanosheets electrode.

**Table S1.** Atom% of Li in RuO<sub>2</sub> sample.

| Elements | EDS results |
|----------|-------------|
| Li       | 6.18        |

**Table S2.** Comparisons of OER performance for some Ru based electrocatalysts in acid condition.

| Catalyst                                                 | Electrolyte                          | Overpotential[mV] at 10 mA cm <sup>-2</sup> | Ref.      |
|----------------------------------------------------------|--------------------------------------|---------------------------------------------|-----------|
| RuO <sub>2</sub> /(CoMn) <sub>3</sub> O <sub>4</sub> /CC | 0.5 M H <sub>2</sub> SO <sub>4</sub> | 270 mV                                      | 1         |
| RuNi <sub>2</sub> @G-250                                 | 0.5 M H <sub>2</sub> SO <sub>4</sub> | 227 mV                                      | 2         |
| Nd <sub>0.1</sub> RuO <sub>x</sub> /CC                   | 0.5 M H <sub>2</sub> SO <sub>4</sub> | 211 mV                                      | 3         |
| Ru/Mo <sub>2</sub> C                                     | 0.5 M H <sub>2</sub> SO <sub>4</sub> | 215 mV                                      | 4         |
| Ru@V-RuO <sub>2</sub> /C HMS                             | 0.5 M H <sub>2</sub> SO <sub>4</sub> | 176 mV                                      | 5         |
| Si-RuO <sub>x</sub> @C                                   | 0.5 M H <sub>2</sub> SO <sub>4</sub> | 220 mV                                      | 6         |
| Co-RuIr nanocrystals                                     | 0.1 M HClO <sub>4</sub>              | 235 mV                                      | 7         |
| a-RuTe <sub>2</sub> PNRs                                 | 0.5 M H <sub>2</sub> SO <sub>4</sub> | 245 mV                                      | 8         |
| RuCu nanosheet                                           | 0.5 M H <sub>2</sub> SO <sub>4</sub> | 236 mV                                      | 9         |
| Ru nanosheet                                             | 0.5 M H <sub>2</sub> SO <sub>4</sub> | 260 mV                                      | 10        |
| Cr <sub>0.6</sub> Ru <sub>0.4</sub> O <sub>2</sub>       | 0.5 M H <sub>2</sub> SO <sub>4</sub> | 178 mV                                      | 11        |
| Ultrafine defective RuO <sub>2</sub>                     | 0.5 M H <sub>2</sub> SO <sub>4</sub> | 179 mV                                      | 12        |
| Cu-doped RuO <sub>2</sub>                                | 0.5 M H <sub>2</sub> SO <sub>4</sub> | 188 mV                                      | 13        |
| Co-doped RuO <sub>2</sub> NWs                            | 0.5 M H <sub>2</sub> SO <sub>4</sub> | 200 mV                                      | 14        |
| NaRuO <sub>2</sub> NSs                                   | 0.1 M HClO <sub>4</sub>              | 255 mV                                      | 15        |
| Ru@FLC                                                   | 0.5 M H <sub>2</sub> SO <sub>4</sub> | 258 mV                                      | 16        |
| RuO <sub>2</sub> NWs                                     | 0.5 M H <sub>2</sub> SO <sub>4</sub> | 234 mV                                      | 17        |
| Li-RuO <sub>2</sub> NSs                                  | 0.5 M H <sub>2</sub> SO <sub>4</sub> | 169 mV                                      | This work |

## Reference:

- 1、 S. Q. Niu, X. P. Kong, S. W. Li, Y. Y. Zhang, J. Wu, W. W. Zhao and P. Xu, *Applied Catalysis B: Environmental*, 2021, **297**, 120442.
- 2、 X. J. Cui, P. J. Ren, C. Ma, J. Zhao, R. X. Chen, S. M. Chen, N. P. Rajan, H. B. Li, L. Yu and Z. Q. Tian, *Adv. Mater.*, 2020, **32**, 1908126.
- 3、 L. Li, G. W. Zhang, J. W. Xu, H. J. He, B. Wang, Z. M. Yang and S. C. Yang, *Adv. Funct. Mater.*, 2023, 2213304.
- 4、 Z. Liu, Y. X. Liu, H. W. He, H. B. Shao, Y. Zhang, J. Li and W. W. Cai, *Electrochim. Acta*, 2023, 141920.
- 5、 Y. P. Li, W. T. Wang, M. Y. Cheng, Y. F. Feng, X. Han, Q. Z. Qian, Y. Zhu and G. Q. Zhang, *Adv. Mater.*, 2023, 2206351.
- 6、 C. X. Liu, Y. B. Jiang, T. Wang, Q. S. Li and Y. Z. Liu, *Adv. Sci.*, 2023, 2207429.
- 7、 J. Q. Shan, T. Ling, K. Davey, Y. Zheng and S. Z. Qiao, *Adv. Mater.*, 2019, **31**, 1900510.
- 8、 J. Wang, L. L. Han, B. L. Huang, Q. Shao, H. L. Xin and X. Q. Huang, *Nature commun.*, 2019, **10**, 5692.
- 9、 Q. Yao, B. L. Huang, N. Zhang, M. Z. Sun, Q. Shao and X. Q. Huang, *Angew. Chem.*, 2019, **131**, 14121-14126.
- 10、 X. K. Kong, K. Xu, C. L. Zhang, J. Dai, S. Norooz Oliaee, L. Y. Li, X. C. Zeng, C. Z. Wu and Z. M. Peng, *Acs Catalysis*, 2016, **6**, 1487-1492.
- 11、 Y. C. Lin, Z. Q. Tian, L. J. Zhang, J. Y. Ma, Z. Jiang, B. J. Deibert, R. X. Ge and L. Chen, *Nature commun.*, 2019, **10**, 162.
- 12、 R. X. Ge, L. Li, J. W. Su, Y. C. Lin, Z. Q. Tian and L. Chen, *Adv. Energy Mater.*, 2019, **9**, 1901313.
- 13、 J. W. Su, R. X. Ge, K. M. Jiang, Y. Dong, F. Hao, Z. Q. Tian, G. X. Chen and L. Chen, *Adv. Mater.*, 2018, **30**, 1801351.
- 14、 J. Wang, Y. J. Ji, R. G. Yin, Y. Y. Li, Q. Shao and X. Q. Huang, *J. Mater. Chem. A*, 2019, **7**, 6411-6416.
- 15、 S. Laha, Y. Lee, F. Podjaski, D. Weber, V. Duppel, L. M. Schoop, F. Pielhofer,



C. Scheurer, K. Müller and U. Starke, *Adv. Energy Mater.*, 2019, **9**, 1803795.

16、 C. X. Shi, Y. Yuan, Q. Shen, X. D. Yang, B. Q. Cao, B. Xu, B. T. Kang, Y. Q. Sun and C. C. Li, *J. Colloid Interface Sci.*, 2022, **612**, 488-495.

17、 J. Yang, Y. J. Ji, Q. Shao, N. Zhang, Y. Y. Li and X. Q. Huang, *Adv. Funct. Mater.*, 2018, **28**, 1803722.
